# Supplementary material for: Serum Fatty Acids, Desaturase Activities and Abdominal Obesity – A Population-Based Study of 60-Year Old Men and Women
Source: PubMed Central journal article supplement (PMC5270324; doi:10.1371/journal.pone.0170684), 2017-01-26
Supplement: pone.0170684.s002.pdf [file pone.0170684.s002.pdf]

**S1 Table. Spearman's rank correlation coefficients between anthropometric measurements, serum fatty acids, and estimated desaturase activities.<sup>1,2</sup>**

| Men/Women <sup>1</sup> | BMI   | SAD   | WC    | WHR   | SADHR | WCHR  | WHHR  | PA    | LA    | ALA   | EPA   | DHA   | SCD   | D5D   | D6D   |
|------------------------|-------|-------|-------|-------|-------|-------|-------|-------|-------|-------|-------|-------|-------|-------|-------|
| BMI                    |       | 0.83  | 0.86  | 0.50  | 0.85  | 0.88  | 0.50  | 0.02  | -0.14 | -0.06 | 0.01  | -0.05 | 0.26  | -0.22 | 0.25  |
| SAD                    | 0.83  |       | 0.87  | 0.59  | 0.96  | 0.84  | 0.50  | 0.00  | -0.16 | -0.03 | 0.00  | -0.10 | 0.29  | -0.25 | 0.27  |
| WC                     | 0.88  | 0.87  |       | 0.78  | 0.83  | 0.96  | 0.67  | 0.04  | -0.19 | -0.01 | 0.00  | -0.09 | 0.30  | -0.26 | 0.29  |
| WHR                    | 0.63  | 0.71  | 0.82  |       | 0.59  | 0.79  | 0.90  | 0.07  | -0.19 | 0.04  | -0.03 | -0.11 | 0.25  | -0.22 | 0.26  |
| SADHR                  | 0.84  | 0.95  | 0.81  | 0.71  |       | 0.88  | 0.62  | -0.02 | -0.15 | -0.05 | -0.02 | -0.10 | 0.28  | -0.25 | 0.27  |
| WCHR                   | 0.90  | 0.83  | 0.93  | 0.83  | 0.88  |       | 0.78  | 0.02  | -0.18 | -0.03 | -0.02 | -0.11 | 0.30  | -0.26 | 0.29  |
| WHHR                   | 0.55  | 0.52  | 0.57  | 0.84  | 0.68  | 0.78  |       | 0.03  | -0.15 | 0.00  | -0.06 | -0.12 | 0.23  | -0.21 | 0.24  |
| PA                     | 0.14  | 0.15  | 0.17  | 0.15  | 0.12  | 0.14  | 0.08  |       | -0.69 | -0.17 | 0.37  | 0.38  | 0.21  | 0.19  | 0.19  |
| LA                     | -0.19 | -0.24 | -0.23 | -0.23 | -0.22 | -0.21 | -0.16 | -0.68 |       | 0.05  | -0.40 | -0.22 | -0.64 | -0.11 | -0.59 |
| ALA                    | -0.11 | -0.07 | -0.10 | -0.08 | -0.09 | -0.12 | -0.10 | -0.16 | 0.05  |       | 0.07  | -0.17 | 0.14  | -0.26 | 0.05  |
| EPA                    | 0.00  | 0.01  | 0.01  | -0.03 | -0.03 | -0.03 | -0.10 | 0.38  | -0.43 | 0.10  |       | 0.67  | 0.00  | 0.37  | 0.09  |
| DHA                    | 0.00  | -0.01 | 0.00  | -0.04 | -0.04 | -0.03 | -0.09 | 0.35  | -0.21 | -0.13 | 0.72  |       | -0.19 | 0.36  | -0.23 |
| SCD                    | 0.27  | 0.32  | 0.28  | 0.27  | 0.32  | 0.29  | 0.23  | 0.23  | -0.66 | 0.11  | 0.07  | -0.18 |       | -0.30 | 0.59  |
| D5D                    | -0.23 | -0.24 | -0.21 | -0.15 | -0.25 | -0.22 | -0.14 | 0.10  | -0.12 | -0.20 | 0.32  | 0.29  | -0.23 |       | -0.14 |
| D6D                    | 0.23  | 0.26  | 0.24  | 0.23  | 0.26  | 0.25  | 0.19  | 0.32  | -0.66 | -0.04 | 0.14  | -0.17 | 0.62  | -0.10 |       |

ALA,  $\alpha$ -linolenic acid; D5D,  $\Delta$ 5-desaturase; D6D,  $\Delta$ 6-desaturase; EPA, eicosapentaenoic acid; DHA, docohexaenoic acid; LA, linoleic acid; PA, palmitic acid; SAD, sagittal abdominal diameter; SADHR, sagittal abdominal diameter-to-height ratio; SCD, stearyl-CoA-desaturase; WC, waist circumference; WCHR, waist circumference-to-height ratio; WHR, waist-hip ratio; WHHR, waist-hip-height ratio.

<sup>1</sup>Spearman's rank correlation coefficients (r) for women and men are shown above and below the diagonal, respectively.

<sup>2</sup>Significance of r:  $|r| > 0.04$ ,  $P < 0.05$ ;  $|r| \geq 0.06$ ,  $P < 0.01$ ;  $|r| \geq 0.07$  in women or  $|r| \geq 0.08$  in men,  $P < 0.001$ ;  $|r| > 0.09$ ,  $P < 0.0001$ .
