# Supplementary material for: Serum Fatty Acids, Desaturase Activities and Abdominal Obesity – A Population-Based Study of 60-Year Old Men and Women
Source: PubMed Central journal article supplement (PMC5270324; doi:10.1371/journal.pone.0170684), 2017-01-26
Supplement: pone.0170684.s003.pdf [file pone.0170684.s003.pdf]

**S2 Table. Associations of serum fatty acids with abdominal obesity in men and women<sup>1</sup>**

|                                   |                                                  | Quartile of serum fatty acids |                  |                  |                  | P <sub>trend</sub> <sup>2</sup> | P <sub>non-linear</sub> <sup>3</sup> |
|-----------------------------------|--------------------------------------------------|-------------------------------|------------------|------------------|------------------|---------------------------------|--------------------------------------|
|                                   |                                                  | 1                             | 2                | 3                | 4                |                                 |                                      |
| <i>Palmitic acid (16:0, PA)</i>   |                                                  |                               |                  |                  |                  |                                 |                                      |
| Men                               | Median (% of total FA)                           | 10.8                          | 11.3             | 11.8             | 12.4             |                                 |                                      |
|                                   | AO prevalence <sup>4</sup> , n (%)               | 114 (24)                      | 115 (24)         | 157 (33)         | 163 (34)         |                                 |                                      |
|                                   | Crude OR <sup>5</sup> (95% CI)                   | 1.00 (reference)              | 1.01 (0.75-1.36) | 1.56 (1.18-2.08) | 1.66 (1.25-2.20) | <0.0001                         | 0.0093                               |
|                                   | Adjusted OR <sup>5,6</sup> (95% CI) <sup>6</sup> | 1.00 (reference)              | 0.97 (0.72-1.32) | 1.58 (1.18-2.12) | 1.61 (1.20-2.16) | 0.0001                          | 0.0090                               |
| Women                             | Median (% of total FA)                           | 10.5                          | 11.0             | 11.4             | 12.0             |                                 |                                      |
|                                   | AO prevalence <sup>4</sup> , n (%)               | 179 (35)                      | 198 (39)         | 207 (41)         | 207 (41)         |                                 |                                      |
|                                   | Crude OR <sup>5</sup> (95% CI)                   | 1.00 (reference)              | 1.17 (0.91-1.52) | 1.26 (0.98-1.63) | 1.27 (0.98-1.64) | 0.06                            | 0.06                                 |
|                                   | Adjusted OR <sup>5,6</sup> (95% CI) <sup>6</sup> | 1.00 (reference)              | 1.20 (0.93-1.56) | 1.30 (1.00-1.69) | 1.39 (1.07-1.80) | 0.0141                          | 0.0296                               |
| <i>Linoleic acid (18:2n6, LA)</i> |                                                  |                               |                  |                  |                  |                                 |                                      |
| Men                               | Median (% of total FA)                           | 43.7                          | 47.4             | 50.0             | 52.9             |                                 |                                      |
|                                   | AO prevalence <sup>4</sup> , n (%)               | 181 (38)                      | 149 (31)         | 119 (25)         | 100 (21)         |                                 |                                      |
|                                   | Crude OR <sup>5</sup> (95% CI)                   | 1.00 (reference)              | 0.74 (0.57-0.97) | 0.54 (0.41-0.72) | 0.43 (0.33-0.58) | <0.0001                         | <0.0001                              |
|                                   | Adjusted OR <sup>5,6</sup> (95% CI) <sup>6</sup> | 1.00 (reference)              | 0.78 (0.59-1.04) | 0.57 (0.42-0.76) | 0.47 (0.34-0.64) | <0.0001                         | <0.0001                              |
| Women                             | Median (% of total FA)                           | 43.8                          | 47.3             | 49.8             | 52.8             |                                 |                                      |
|                                   | AO prevalence <sup>4</sup> , n (%)               | 265 (52)                      | 209 (41)         | 172 (34)         | 145 (29)         |                                 |                                      |
|                                   | Crude OR <sup>5</sup> (95% CI)                   | 1.00 (reference)              | 0.64 (0.50-0.82) | 0.47 (0.36-0.60) | 0.37 (0.28-0.48) | <0.0001                         | 0.0061                               |
|                                   | Adjusted OR <sup>5,6</sup> (95% CI) <sup>6</sup> | 1.00 (reference)              | 0.62 (0.48-0.80) | 0.45 (0.35-0.59) | 0.34 (0.26-0.45) | <0.0001                         | 0.0132                               |
| <i>α-linolenic acid</i>           |                                                  |                               |                  |                  |                  |                                 |                                      |
| Men                               | Median (% of total FA)                           | 0.66                          | 0.80             | 0.91             | 1.09             |                                 |                                      |
|                                   | AO prevalence <sup>4</sup> , n (%)               | 169 (36)                      | 137 (29)         | 128 (27)         | 115 (24)         |                                 |                                      |
|                                   | Crude OR <sup>5</sup> (95% CI)                   | 1.00 (reference)              | 0.73 (0.56-0.96) | 0.67 (0.51-0.88) | 0.58 (0.44-0.77) | 0.0001                          | 0.20                                 |
|                                   | Adjusted OR <sup>5,6</sup> (95% CI) <sup>6</sup> | 1.00 (reference)              | 0.77 (0.59-1.02) | 0.67 (0.51-0.89) | 0.57 (0.43-0.77) | 0.001                           | 0.32                                 |
| Women                             | Median (% of total FA)                           | 0.69                          | 0.82             | 0.94             | 1.11             |                                 |                                      |
|                                   | AO prevalence <sup>4</sup> , n (%)               | 207 (41)                      | 196 (39)         | 196 (39)         | 192 (38)         |                                 |                                      |
|                                   | Crude OR <sup>5</sup> (95% CI)                   | 1.00 (reference)              | 0.91 (0.71-1.17) | 0.91 (0.71-1.17) | 0.89 (0.69-1.14) | 0.38                            | 0.41                                 |
|                                   | Adjusted OR <sup>5,6</sup> (95% CI) <sup>6</sup> | 1.00 (reference)              | 0.95 (0.74-1.23) | 0.93 (0.72-1.20) | 0.90 (0.69-1.16) | 0.41                            | 0.32                                 |
| <i>Eicosapentaenoic acid</i>      |                                                  |                               |                  |                  |                  |                                 |                                      |
| Men                               | Median (% of total FA)                           | 1.16                          | 1.65             | 2.13             | 3.08             |                                 |                                      |
|                                   | AO prevalence <sup>4</sup> , n (%)               | 143 (30)                      | 143 (30)         | 148 (31)         | 115 (25)         |                                 |                                      |
|                                   | Crude OR <sup>5</sup> (95% CI)                   | 1.00 (reference)              | 1.00 (0.76-1.32) | 1.05 (0.80-1.38) | 0.74 (0.56-0.99) | 0.0375                          | 0.52                                 |
|                                   | Adjusted OR <sup>5,6</sup> (95% CI) <sup>6</sup> | 1.00 (reference)              | 1.01 (0.76-1.35) | 1.07 (0.81-1.43) | 0.76 (0.57-1.03) | 0.07                            | 0.45                                 |
| Women                             | Median (% of total FA)                           | 1.24                          | 1.66             | 2.13             | 3.07             |                                 |                                      |
|                                   | AO prevalence <sup>4</sup> , n (%)               | 179 (35)                      | 218 (43)         | 192 (38)         | 202 (40)         |                                 |                                      |
|                                   | Crude OR <sup>5</sup> (95% CI)                   | 1.00 (reference)              | 1.38 (1.07-1.78) | 1.12 (0.86-1.44) | 1.22 (0.94-1.57) | 0.44                            | 0.45                                 |
|                                   | Adjusted OR <sup>5,6</sup> (95% CI) <sup>6</sup> | 1.00 (reference)              | 1.46 (1.12-1.89) | 1.30 (1.00-1.69) | 1.46 (1.12-1.91) | 0.0305                          | 0.10                                 |
| <i>Docohexaenoic acid</i>         |                                                  |                               |                  |                  |                  |                                 |                                      |
| Men                               | Median (% of total FA)                           | 0.63                          | 0.81             | 0.95             | 1.19             |                                 |                                      |
|                                   | AO prevalence <sup>4</sup> , n (%)               | 147 (31)                      | 138 (29)         | 149 (31)         | 115 (24)         |                                 |                                      |
|                                   | Crude OR <sup>5</sup> (95% CI)                   | 1.00 (reference)              | 0.91 (0.69-1.21) | 1.02 (0.77-1.34) | 0.71 (0.54-0.95) | 0.0378                          | 0.18                                 |
|                                   | Adjusted OR <sup>5,6</sup> (95% CI) <sup>6</sup> | 1.00 (reference)              | 0.93 (0.70-1.24) | 1.08 (0.81-1.43) | 0.80 (0.59-1.08) | 0.23                            | 0.13                                 |
| Women                             | Median (% of total FA)                           | 0.67                          | 0.83             | 0.97             | 1.19             |                                 |                                      |
|                                   | AO prevalence <sup>4</sup> , n (%)               | 227 (45)                      | 207 (41)         | 194 (38)         | 163 (32)         |                                 |                                      |
|                                   | Crude OR <sup>5</sup> (95% CI)                   | 1.00 (reference)              | 0.85 (0.66-1.09) | 0.76 (0.60-0.98) | 0.59 (0.45-0.76) | <0.0001                         | 0.96                                 |
|                                   | Adjusted OR <sup>5,6</sup> (95% CI) <sup>6</sup> | 1.00 (reference)              | 0.94 (0.73-1.22) | 0.89 (0.68-1.15) | 0.73 (0.56-0.95) | 0.0160                          | 0.74                                 |

<sup>1</sup>FA, fatty acid; OR, odds ratio; <sup>2</sup>P for overall trend (P<sub>trend</sub>) was evaluated using logistic regression models with sex-specific quartile median as exposure. <sup>3</sup>P for nonlinearity (P<sub>non-linear</sub>) was evaluated using restricted cubic splines. <sup>4</sup>Abdominal obesity was defined as WC>88 cm in women and WC>102 cm in men. <sup>5</sup>OR and 95% CI were evaluated using logistic regression models. <sup>6</sup>Adjusted for physical activity, alcohol intake, education and smoking.
