# Supplementary material for: Serum Fatty Acids, Desaturase Activities and Abdominal Obesity – A Population-Based Study of 60-Year Old Men and Women
Source: PubMed Central journal article supplement (PMC5270324; doi:10.1371/journal.pone.0170684), 2017-01-26
Supplement: pone.0170684.s004.pdf [file pone.0170684.s004.pdf]

**S3 Table. Associations of serum fatty acids with anthropometric measures in men and women<sup>1,2</sup>**

|                                   |       | Quartile of serum fatty acids |                  |                  |                   | P <sub>trend</sub> <sup>3</sup> | P <sub>non-linear</sub> <sup>4</sup> |
|-----------------------------------|-------|-------------------------------|------------------|------------------|-------------------|---------------------------------|--------------------------------------|
|                                   |       | 1                             | 2                | 3                | 4                 |                                 |                                      |
| <i>Palmitic acid (16:0, PA)</i>   |       |                               |                  |                  |                   |                                 |                                      |
| SAD, cm                           | Men   | 21.1 (20.8-21.3)              | 21.2 (20.9-21.4) | 21.7 (21.5-21.9) | 22.0 (21.7-22.2)  | <0.0001                         | 0.0125                               |
|                                   | Women | 19.6 (19.4-19.9)              | 19.8 (19.5-20.0) | 19.8 (19.6-20.0) | 19.8 (19.6-20.1)  | 0.21                            | 0.0493                               |
| WC, cm                            | Men   | 96.0 (95.1-96.9)              | 96.6 (95.7-97.5) | 98.7 (97.8-99.6) | 99.9 (99.0-100.9) | <0.0001                         | 0.0118                               |
|                                   | Women | 85.5 (84.4-86.5)              | 86.3 (85.2-87.3) | 86.8 (85.7-87.8) | 87.1 (86.0-88.1)  | 0.0258                          | 0.0168                               |
| WHR                               | Men   | 0.94 (0.94-0.95)              | 0.95 (0.94-0.95) | 0.96 (0.95-0.96) | 0.96 (0.96-0.97)  | <0.0001                         | 0.003                                |
|                                   | Women | 0.82 (0.82-0.83)              | 0.83 (0.82-0.83) | 0.83 (0.82-0.84) | 0.84 (0.83-0.84)  | 0.0005                          | 0.12                                 |
| <i>Linoleic acid (18:2n6, LA)</i> |       |                               |                  |                  |                   |                                 |                                      |
| SAD, cm                           | Men   | 22.2 (21.9-22.4)              | 21.9 (21.7-22.1) | 21.1 (20.9-21.4) | 20.7 (20.5-20.9)  | <0.0001                         | <0.0001                              |
|                                   | Women | 20.5 (20.2-20.7)              | 19.9 (19.7-20.1) | 19.6 (19.3-19.8) | 19.1 (18.8-19.3)  | <0.0001                         | 0.0018                               |
| WC, cm                            | Men   | 100.6 (99.6-101.5)            | 99.0 (98.1-99.9) | 96.8 (95.8-97.7) | 94.8 (93.9-95.8)  | <0.0001                         | <0.0001                              |
|                                   | Women | 89.6 (88.6-90.6)              | 87.3 (86.3-88.3) | 85.3 (84.3-86.3) | 83.3 (82.3-84.3)  | <0.0001                         | 0.0003                               |
| WHR                               | Men   | 0.97 (0.96-0.97)              | 0.96 (0.95-0.96) | 0.95 (0.94-0.95) | 0.93 (0.93-0.94)  | <0.0001                         | 0.0004                               |
|                                   | Women | 0.85 (0.84-0.85)              | 0.83 (0.82-0.83) | 0.82 (0.82-0.83) | 0.81 (0.81-0.82)  | <0.0001                         | 0.12                                 |
| <i>α-linolenic acid</i>           |       |                               |                  |                  |                   |                                 |                                      |
| SAD, cm                           | Men   | 21.7 (21.5-22.0)              | 21.5 (21.2-21.7) | 21.5 (21.3-21.8) | 21.2 (20.9-21.4)  | 0.0019                          | 0.44                                 |
|                                   | Women | 19.9 (19.7-20.2)              | 19.9 (19.6-20.1) | 19.6 (19.3-19.8) | 19.7 (19.5-19.9)  | 0.12                            | 0.62                                 |
| WC, cm                            | Men   | 99.1 (98.2-100.1)             | 97.9 (97.0-98.8) | 97.7 (96.8-98.6) | 96.5 (95.6-97.4)  | 0.0001                          | 0.69                                 |
|                                   | Women | 86.8 (85.8-87.8)              | 86.4 (85.4-87.4) | 85.7 (84.7-86.7) | 86.6 (85.6-87.6)  | 0.65                            | 0.33                                 |
| WHR                               | Men   | 0.96 (0.95-0.96)              | 0.95 (0.94-0.95) | 0.95 (0.94-0.95) | 0.95 (0.94-0.95)  | 0.0016                          | 0.11                                 |
|                                   | Women | 0.83 (0.82-0.83)              | 0.83 (0.82-0.83) | 0.83 (0.82-0.83) | 0.83 (0.83-0.84)  | 0.10                            | 0.32                                 |
| <i>Eicosapentaenoic acid</i>      |       |                               |                  |                  |                   |                                 |                                      |
| SAD, cm                           | Men   | 21.3 (21.0-21.5)              | 21.6 (21.4-21.9) | 21.7 (21.4-21.9) | 21.4 (21.1-21.6)  | 0.94                            | 0.08                                 |
|                                   | Women | 19.5 (19.3-19.8)              | 19.8 (19.6-20.0) | 19.8 (19.6-20.0) | 19.9 (19.7-20.2)  | 0.03                            | 0.0305                               |
| WC, cm                            | Men   | 97.2 (96.2-98.1)              | 98.3 (97.4-99.2) | 98.4 (97.5-99.4) | 97.3 (96.4-98.3)  | 0.90                            | 0.15                                 |
|                                   | Women | 85.4 (84.4-86.4)              | 86.3 (85.3-87.3) | 86.7 (85.6-87.7) | 87.2 (86.2-88.2)  | 0.02                            | 0.042                                |
| WHR                               | Men   | 0.95 (0.94-0.95)              | 0.96 (0.95-0.96) | 0.95 (0.95-0.96) | 0.95 (0.94-0.95)  | 0.31                            | 0.90                                 |
|                                   | Women | 0.83 (0.82-0.83)              | 0.83 (0.82-0.84) | 0.83 (0.82-0.83) | 0.83 (0.82-0.83)  | 0.78                            | 0.56                                 |
| <i>Docohexaenoic acid</i>         |       |                               |                  |                  |                   |                                 |                                      |
| SAD, cm                           | Men   | 21.4 (21.2-21.7)              | 21.5 (21.2-21.7) | 21.6 (21.3-21.8) | 21.4 (21.2-21.7)  | 0.97                            | 0.10                                 |
|                                   | Women | 19.9 (19.7-20.2)              | 19.8 (19.5-20.0) | 19.7 (19.5-19.9) | 19.6 (19.4-19.9)  | 0.08                            | 0.85                                 |
| WC, cm                            | Men   | 97.4 (96.4-98.3)              | 97.7 (96.8-98.7) | 98.2 (97.3-99.1) | 97.9 (97.0-98.8)  | 0.36                            | 0.07                                 |
|                                   | Women | 87.1 (86.0-88.1)              | 86.6 (85.6-87.6) | 86.1 (85.1-87.1) | 85.8 (84.8-86.8)  | 0.08                            | 0.84                                 |
| WHR                               | Men   | 0.95 (0.95-0.96)              | 0.95 (0.94-0.95) | 0.95 (0.95-0.96) | 0.95 (0.95-0.96)  | 0.89                            | 0.17                                 |
|                                   | Women | 0.83 (0.83-0.84)              | 0.83 (0.83-0.84) | 0.82 (0.82-0.83) | 0.82 (0.82-0.83)  | 0.0019                          | 0.18                                 |

<sup>1</sup>FA, fatty acid; SAD, sagittal abdominal diameter; WC, waist circumference; WHR, waist-hip ratio. <sup>2</sup>Values are quartile means (95% CI) adjusted for physical activity, alcohol intake, education and smoking. <sup>3</sup>P for overall trend (P<sub>trend</sub>) was evaluated using linear regression models with sex-specific quartile median as exposure. <sup>4</sup>P for nonlinearity (P<sub>non-linear</sub>) was evaluated using restricted cubic splines.
