# Supplementary material for: Serum Fatty Acids, Desaturase Activities and Abdominal Obesity – A Population-Based Study of 60-Year Old Men and Women
Source: PubMed Central journal article supplement (PMC5270324; doi:10.1371/journal.pone.0170684), 2017-01-26
Supplement: pone.0170684.s005.pdf [file pone.0170684.s005.pdf]

**S4 Table. Associations of estimated desaturase activities with abdominal obesity in men and women<sup>1</sup>**

|                                   | Quartile of estimated desaturase activity |                  |                  |                  | P <sub>trend</sub> <sup>2</sup> | P <sub>non-linear</sub> <sup>3</sup> |
|-----------------------------------|-------------------------------------------|------------------|------------------|------------------|---------------------------------|--------------------------------------|
|                                   | 1                                         | 2                | 3                | 4                |                                 |                                      |
| <i>SCD</i>                        |                                           |                  |                  |                  |                                 |                                      |
| Men                               |                                           |                  |                  |                  |                                 |                                      |
| Median activity*                  | 0.19                                      | 0.25             | 0.30             | 0.42             |                                 |                                      |
| AO prevalence, n (%)              | 74 (16)                                   | 107 (23)         | 174 (37)         | 194 (41)         |                                 |                                      |
| Crude OR (95% CI)                 | 1.00 (reference)                          | 1.58 (1.13-2.19) | 3.13 (2.30-4.28) | 3.75 (2.76-5.11) | <0.0001                         | <0.0001                              |
| Adjusted OR (95% CI) <sup>6</sup> | 1.00 (reference)                          | 1.54 (1.11-2.16) | 3.08 (2.24-4.25) | 3.65 (2.61-5.12) | <0.0001                         | <0.0001                              |
| Women                             |                                           |                  |                  |                  |                                 |                                      |
| Median activity*                  | 0.23                                      | 0.29             | 0.36             | 0.47             |                                 |                                      |
| AO prevalence, n (%)              | 116 (23)                                  | 162 (32)         | 231 (46)         | 282 (56)         |                                 |                                      |
| Crude OR (95% CI)                 | 1.00 (reference)                          | 1.58 (1.20-2.09) | 2.82 (2.15-3.70) | 4.24 (3.23-5.57) | <0.0001                         | <0.0001                              |
| Adjusted OR (95% CI) <sup>6</sup> | 1.00 (reference)                          | 1.67 (1.25-2.22) | 2.93 (2.22-3.87) | 4.68 (3.51-6.25) | <0.0001                         | <0.0001                              |
| <i>D5D</i>                        |                                           |                  |                  |                  |                                 |                                      |
| Men                               |                                           |                  |                  |                  |                                 |                                      |
| Median activity*                  | 6.77                                      | 8.16             | 9.48             | 11.47            |                                 |                                      |
| AO prevalence, n (%)              | 175 (37)                                  | 160 (34)         | 122 (26)         | 92 (19)          |                                 |                                      |
| Crude OR (95% CI)                 | 1.00 (reference)                          | 0.87 (0.67-1.14) | 0.59 (0.49-0.78) | 0.41 (0.31-0.55) | <0.0001                         | 0.08                                 |
| Adjusted OR (95% CI) <sup>6</sup> | 1.00 (reference)                          | 0.88 (0.67-1.16) | 0.60 (0.45-0.80) | 0.40 (0.30-0.55) | <0.0001                         | 0.12                                 |
| Women                             |                                           |                  |                  |                  |                                 |                                      |
| Median activity*                  | 6.66                                      | 8.06             | 9.50             | 11.44            |                                 |                                      |
| AO prevalence, n (%)              | 256 (50)                                  | 225 (44)         | 167 (33)         | 143 (28)         |                                 |                                      |
| Crude OR (95% CI)                 | 1.00 (reference)                          | 0.78 (0.61-1.00) | 0.48 (0.37-0.62) | 0.39 (0.30-0.50) | <0.0001                         | 0.0029                               |
| Adjusted OR (95% CI) <sup>6</sup> | 1.00 (reference)                          | 0.81 (0.63-1.04) | 0.48 (0.37-0.62) | 0.41 (0.31-0.53) | <0.0001                         | 0.0017                               |
| <i>D6D</i>                        |                                           |                  |                  |                  |                                 |                                      |
| Men                               |                                           |                  |                  |                  |                                 |                                      |
| Median activity*                  | 0.011                                     | 0.015            | 0.020            | 0.027            |                                 |                                      |
| AO prevalence, n (%)              | 100 (21)                                  | 119 (25)         | 136 (29)         | 194 (41)         |                                 |                                      |
| Crude OR (95% CI)                 | 1.00 (reference)                          | 1.25 (0.93-1.70) | 1.50 (1.12-2.02) | 2.60 (1.95-3.46) | <0.0001                         | 0.33                                 |
| Adjusted OR (95% CI) <sup>6</sup> | 1.00 (reference)                          | 1.21 (0.89-1.65) | 1.44 (1.06-1.95) | 2.39 (1.78-3.22) | <0.0001                         | 0.33                                 |
| Women                             |                                           |                  |                  |                  |                                 |                                      |
| Median activity*                  | 0.011                                     | 0.016            | 0.021            | 0.028            |                                 |                                      |
| AO prevalence, n (%)              | 131 (26)                                  | 152 (30)         | 220 (43)         | 288 (57)         |                                 |                                      |
| Crude OR (95% CI)                 | 1.00 (reference)                          | 1.23 (0.93-1.62) | 2.20 (1.69-2.87) | 3.79 (2.91-4.94) | <0.0001                         | 0.0022                               |
| Adjusted OR (95% CI) <sup>6</sup> | 1.00 (reference)                          | 1.18 (0.89-1.57) | 2.09 (1.59-2.74) | 3.55 (2.70-4.67) | <0.0001                         | 0.0036                               |

<sup>1</sup>D5D, Δ5-desaturase; D6D, Δ6-desaturase; OR, odds ratio; SCD, stearoyl-CoA desaturase; WC, waist circumference; WHR, waist-hip ratio. <sup>2</sup>P for overall trend (P<sub>trend</sub>) was evaluated using logistic regression models with sex-specific quartile median as exposure. <sup>3</sup>P for nonlinearity (P<sub>non-linear</sub>) was evaluated using restricted cubic splines. <sup>4</sup>Abdominal obesity was defined as WC>88 cm in women and WC>102 cm in men. <sup>5</sup>OR and 95% CI were evaluated using logistic regression models. <sup>6</sup>Adjusted for physical activity, alcohol intake, education and smoking.
