# Supplementary material for: Serum Fatty Acids, Desaturase Activities and Abdominal Obesity – A Population-Based Study of 60-Year Old Men and Women
Source: PubMed Central journal article supplement (PMC5270324; doi:10.1371/journal.pone.0170684), 2017-01-26
Supplement: pone.0170684.s006.pdf [file pone.0170684.s006.pdf]

**S5 Table. Associations of estimated desaturase activities with anthropometric measures in men and women.<sup>1,2</sup>**

|            |       | Quartile of serum fatty acids |                   |                    |                     | P <sub>trend</sub> <sup>3</sup> | P <sub>non-linear</sub> <sup>4</sup> |
|------------|-------|-------------------------------|-------------------|--------------------|---------------------|---------------------------------|--------------------------------------|
|            |       | 1                             | 2                 | 3                  | 4                   |                                 |                                      |
| <i>SCD</i> |       |                               |                   |                    |                     |                                 |                                      |
| SAD, cm    | Men   | 20.4 (20.2-20.7)              | 21.0 (20.8-21.3)  | 22.0 (21.7-22.2)   | 22.5 (22.2-22.7)    | <0.0001                         | <0.0001                              |
|            | Women | 18.7 (18.5-18.9)              | 19.4 (19.1-19.6)  | 20.1 (19.9-20.4)   | 20.8 (20.6-21.1)    | <0.0001                         | <0.0001                              |
| WC, cm     | Men   | 93.8 (92.9-94.8)              | 96.5 (95.6-97.3)  | 100.0 (99.1-100.8) | 101.0 (100.0-101.9) | <0.0001                         | <0.0001                              |
|            | Women | 81.4 (80.4-82.4)              | 85.0 (84.0-86.0)  | 88.1 (87.1-89.0)   | 91.1 (90.1-92.1)    | <0.0001                         | <0.0001                              |
| WHR        | Men   | 0.93 (0.93-0.94)              | 0.94 (0.94-0.95)  | 0.96 (0.96-0.97)   | 0.97 (0.96-0.97)    | <0.0001                         | <0.0001                              |
|            | Women | 0.81 (0.80-0.81)              | 0.82 (0.82-0.83)  | 0.83 (0.83-0.84)   | 0.85 (0.85-0.86)    | <0.0001                         | 0.0015                               |
| <i>D5D</i> |       |                               |                   |                    |                     |                                 |                                      |
| SAD, cm    | Men   | 22.2 (22.0-22.4)              | 21.9 (21.7-22.1)  | 21.2 (21.0-21.4)   | 20.6 (20.4-20.8)    | <0.0001                         | 0.0005                               |
|            | Women | 20.6 (20.4-20.9)              | 19.9 (19.6-20.1)  | 19.4 (19.2-19.7)   | 19.1 (18.8-19.3)    | <0.0001                         | 0.0008                               |
| WC, cm     | Men   | 100.3 (99.4-101.2)            | 99.2 (98.3-100.1) | 96.8 (95.9-97.7)   | 95.0 (94.0-95.9)    | <0.0001                         | 0.0055                               |
|            | Women | 90.2 (89.2-91.2)              | 87.1 (86.1-88.0)  | 85.0 (84.1-86.0)   | 83.2 (82.2-84.2)    | <0.0001                         | 0.0002                               |
| WHR        | Men   | 0.96 (0.96-0.97)              | 0.96 (0.95-0.96)  | 0.95 (0.94-0.95)   | 0.94 (0.93-0.94)    | <0.0001                         | 0.1024                               |
|            | Women | 0.85 (0.84-0.85)              | 0.83 (0.83-0.84)  | 0.82 (0.82-0.83)   | 0.81 (0.81-0.82)    | <0.0001                         | 0.0027                               |
| <i>D6D</i> |       |                               |                   |                    |                     |                                 |                                      |
| SAD, cm    | Men   | 20.7 (20.5-21.0)              | 21.2 (20.9-21.4)  | 21.7 (21.4-21.9)   | 22.3 (22.1-22.6)    | <0.0001                         | 0.0046                               |
|            | Women | 18.9 (18.7-19.2)              | 19.4 (19.1-19.6)  | 20.0 (19.8-20.2)   | 20.8 (20.5-21.0)    | <0.0001                         | 0.0061                               |
| WC, cm     | Men   | 95.0 (94.1-95.9)              | 97.0 (96.1-97.9)  | 98.5 (97.6-99.4)   | 100.7 (99.8-101.7)  | <0.0001                         | 0.0044                               |
|            | Women | 82.7 (81.8-83.7)              | 84.5 (83.6-85.5)  | 87.7 (86.7-88.7)   | 90.6 (89.6-91.5)    | <0.0001                         | 0.0001                               |
| WHR        | Men   | 0.94 (0.93-0.94)              | 0.95 (0.94-0.95)  | 0.96 (0.95-0.96)   | 0.96 (0.96-0.97)    | <0.0001                         | 0.0003                               |
|            | Women | 0.81 (0.80-0.82)              | 0.82 (0.81-0.82)  | 0.83 (0.83-0.84)   | 0.85 (0.84-0.86)    | <0.0001                         | 0.0004                               |

<sup>1</sup>D5D,  $\Delta 5$ -desaturase; D6D,  $\Delta 6$ -desaturase; SAD, sagittal abdominal diameter; SCD, stearoyl-CoA desaturase; WC, waist circumference; WHR, waist-hip ratio. <sup>2</sup>Values are quartile means (95% CI) adjusted for physical activity, alcohol intake, education and smoking. <sup>3</sup>P for overall trend (P<sub>trend</sub>) was evaluated using linear regression models with sex-specific quartile median as exposure. <sup>4</sup>P for nonlinearity (P<sub>non-linear</sub>) was evaluated using restricted cubic splines.
